# Supplementary material
Source: PubMed Central journal article supplement (PMC2904485)
Supplement: NIHMS197710-supplement-supplement.pdf [file NIHMS197710-supplement-supplement.pdf]

## Supplemental Material 1. qPCR values for 15 genes in human brain tissues

|        | Normal  |          | GBM       |              |            |            |            | Met        |             |             |             |              |
|--------|---------|----------|-----------|--------------|------------|------------|------------|------------|-------------|-------------|-------------|--------------|
|        | N1      | N2       | G1        | G2           | G3         | G4         | G5         | M1         | M2          | M3          | M4          | M5           |
| AKAP13 | 1.0±0.2 | 2.9±0.2  | 3.9±0.2   | 10.8±0.7     | 10.3±1.1   | 4.8±1.0    | 2.2±0.2    | 6.9±2.4    | 5.1±0.5     | 5.2±1.2     | 6.0±1.1     | 2.0±0.1      |
| COL1A1 | 1.0±0.0 | 0.2±0.0  | 32.7±13.3 | 30.5±9.7     | 16.2±2.6   | 4.2±0.3    | 14.7±1.6   | 30.7±10.5  | 499.5±111.7 | 33.7±11.8   | 67.5±3.6    | 449.2±90.3   |
| COL3A1 | 1.0±0.2 | 5.5±1.1  | 89.8±25.2 | 1405.8±157.7 | 552.5±59.1 | 200.3±12.1 | 800.2±11.8 | 515.6±86.0 | 3690.2±88.0 | 608.1±157.5 | 1890.1±22.8 | 8424.9±495.2 |
| COL4A1 | 1.0±0.0 | 0.2±0.0  | 8.9±1.3   | 7.2±0.4      | 8.9±0.9    | 2.9±0.6    | 2.0±0.0    | 3.9±0.5    | 3.6±1.3     | 5.6±1.3     | 3.3±0.2     | 11.4±2.0     |
| COL6A2 | 1.0±0.2 | 6.5±1.0  | 17.6±1.3  | 20.5±3.4     | 159.0±39.2 | 13.6±1.1   | 104.6±16.3 | 551.0±98.5 | 29.5±5.5    | 9.4±0.4     | 32.4±1.5    | 115.4±25.2   |
| CXCR7  | 1.0±0.2 | 2.0±0.6  | 2.2±0.4   | 1.1±0.2      | 2.5±0.3    | 0.7±0.1    | 0.4±0.1    | 0.3±0.1    | 0.7±0.0     | 0.8±0.1     | 0.3±0.1     | 1.1±0.1      |
| EDNRB  | 1.0±0.2 | 3.5±0.6  | 1.7±0.4   | 1.7±0.2      | 1.3±0.3    | 1.2±0.3    | 0.0±0.0    | 0.0±0.0    | 0.0±0.0     | 0.0±0.0     | 0.0±0.0     | 0.0±0.0      |
| HSPG2  | 1.0±0.3 | 2.3±0.4  | 17.0±2.8  | 17.9±0.3     | 24.8±6.5   | 12.8±0.9   | 9.4±1.1    | 20.4±4.2   | 22.6±2.9    | 14.5±2.7    | 22.6±0.6    | 43.1±7.6     |
| ITGA5  | 1.0±0.0 | 1.5±0.4  | 11.9±5.0  | 3.7±0.3      | 7.5±1.6    | 4.3±1.0    | 2.3±0.5    | 25.4±7.7   | 4.6±0.9     | 3.5±0.8     | 7.2±1.3     | 16.8±7.4     |
| LAMC3  | 1.0±0.0 | 20.7±1.8 | 37.4±0.2  | 32.6±4.6     | 24.7±4.8   | 12.4±0.8   | 8.4±1.4    | 83.7±24.3  | 4.5±0.6     | 14.5±2.2    | 5.2±1.3     | 3.9±0.0      |
| PXDN   | 1.0±0.3 | 2.0±0.5  | 12.7±2.4  | 17.4±2.6     | 25.2±4.3   | 8.9±1.9    | 4.5±0.1    | 19.3±0.0   | 10.9±2.4    | 30.0±2.7    | 3.6±0.4     | 9.2±1.9      |
| MMP14  | 1.0±0.2 | 0.7±0.2  | 8.0±1.0   | 6.2±0.5      | 16.0±2.6   | 7.8±0.4    | 3.6±0.2    | 19.0±1.1   | 7.3±0.8     | 5.3±0.9     | 5.4±0.4     | 14.4±1.2     |
| SOX4   | 1.0±0.0 | 0.5±0.1  | 1.7±0.2   | 0.8±0.2      | 3.0±1.1    | 0.5±0.0    | 0.4±0.0    | 0.7±0.1    | 1.0±0.0     | 1.9±0.5     | 3.2±0.3     | 0.9±0.2      |
| TEM1   | 1.0±0.2 | 0.4±0.0  | 1.5±0.2   | 1.9±0.4      | 1.6±0.2    | 0.7±0.0    | 0.6±0.1    | 0.9±0.2    | 1.0±0.0     | 1.8±0.4     | 0.9±1.0     | 2.3±0.4      |
| PV1    | 1.0±0.3 | 22.5±0.3 | 78.2±9.0  | 142.6±13.5   | 159.2±37.8 | 37.1±3.5   | 39.8±7.0   | 118.4±30.4 | 109.2±6.9   | 185.6±45.4  | 125.6±20.2  | 174.6±58.8   |

Note: Met: metastatic brain tumor.
